# Supplementary material
Source: Springer Nature journal article supplement (https://www.springermedizin.de/resource/supplementary/12943_2013_1250_MOESM13_ESM.pdf/9553056)

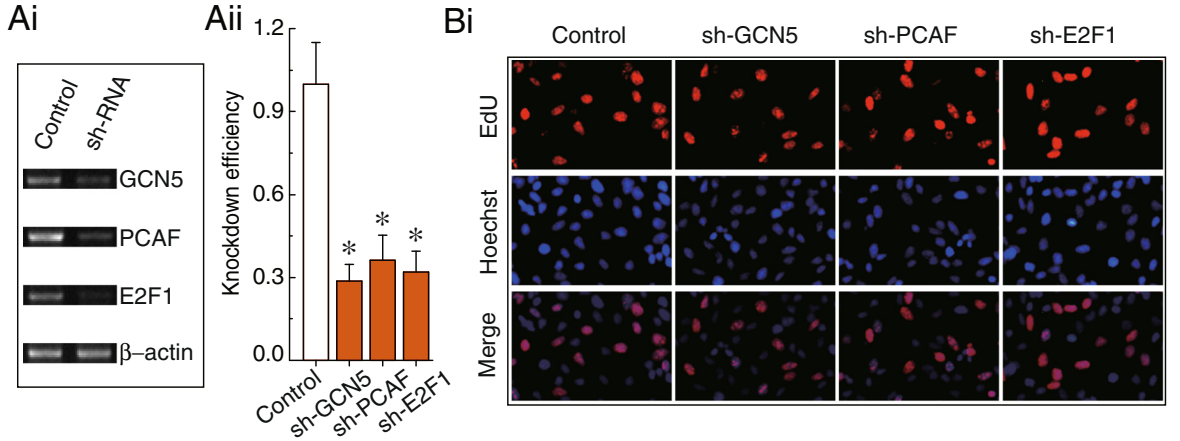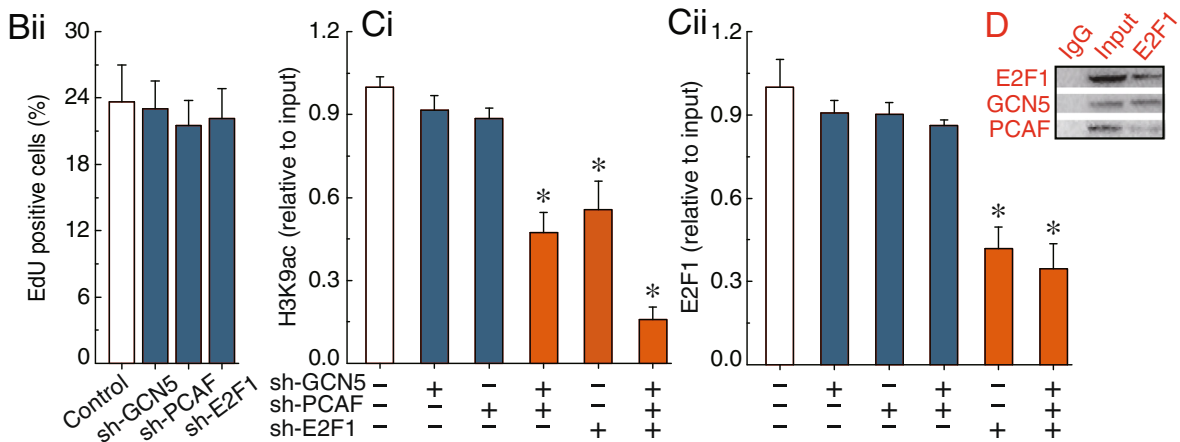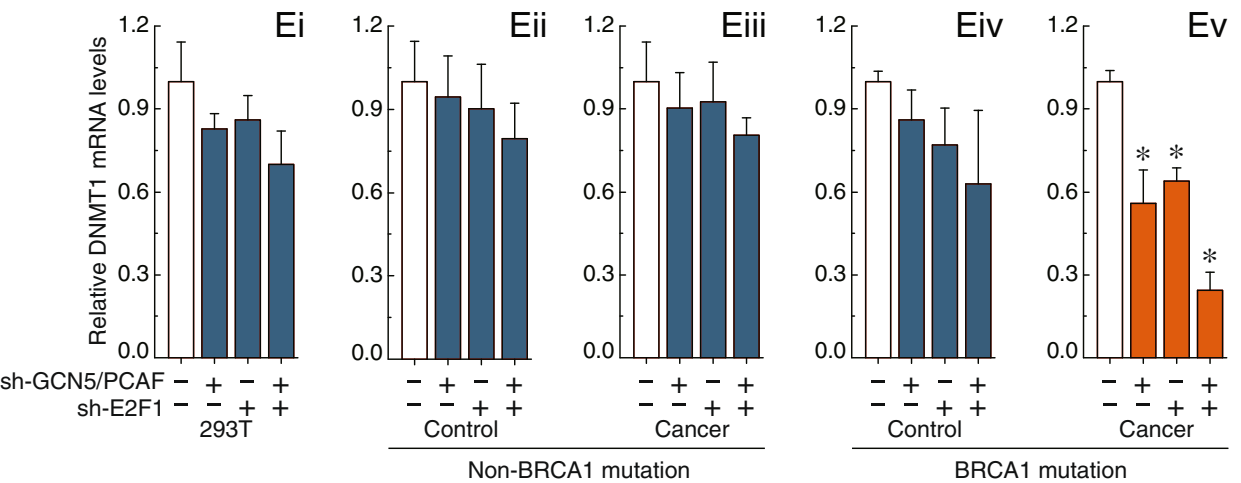

Supplement: MOESM13 [file 9553056]
